# Supplementary material for: Three-dimensional geometrical changes of the human tibialis anterior muscle and its central aponeurosis measured with three-dimensional ultrasound during isometric contractions
Source: PeerJ. 2016 Jul 28;4:e2260. doi: 10.7717/peerj.2260 (PMC4974924; doi:10.7717/peerj.2260)
Supplement: Supplemental Information 9 — (A) Muscle cross-sectional area (CSA), (B) muscle thickness and (C) muscle width from 25–75% of muscle length and (D) central aponeurosis width from 10–90% of central aponeurosis length for each participant at rest and across the contraction conditions. [file peerj-04-2260-s009.xlsx]

## Sheet: A)CSA
Muscle CSA (mm^2)		% Muscle length
	Participant #	25	26	27	28	29	30	31	32	33	34	35	36	37	38	39	40	41	42	43	44	45	46	47	48	49	50	51	52	53	54	55	56	57	58	59	60	61	62	63	64	65	66	67	68	69	70	71	72
0%MVIC	1	978.181	992.415	1004.73	1009.31	1011.74	1013.73	1009.76	1006.36	1000.18	989.102	980.76	972.104	957.869	951.061	941.58	932.562	921.589	910.182	893.58	877.748	866.757	851.403	836.653	825.237	805.383	783.699	769.102	760.163	753.75	744.096	729.434	714.949	702.045	691.212	678.758	657.681	641.042	626.305	610.473	587.912	569.379	549.866	533.231	513.628	496.281	476.237	462.111	443.21
	2	1370.11	1374.68	1374.9	1380.08	1381.18	1382.8	1385.44	1382.02	1368.23	1348.29	1329.86	1312.5	1297.69	1283.08	1264.66	1235.48	1201.58	1161.81	1126.12	1092.63	1066.06	1032.63	999.016	976.057	947.581	911.179	883.876	858.284	833.643	810.919	783.917	768.309	752.184	733.175	717.644	698.338	677.596	661.885	645.353	624.198	600.978	580.76	563.67	542.69	524.75	507.133	484.821	463.734
	3	704.482	710.162	712.662	718.693	717.414	718.605	715.392	720.376	720.162	715.067	707.45	697.635	693.502	688.266	688.268	683.408	670.021	659.035	641.526	624.367	611.071	592.559	572.399	554.206	542.944	527.489	509.771	495.373	478.347	462.476	450.5	439.743	425.724	416.533	406.337	394.449	381.239	375.538	362.365	350.446	345.387	334.107	334.339	326.95	317.743	308.133	298.187	289.643
	4	1262.45	1261.8	1254.72	1247.51	1240.01	1232.81	1222.15	1205.43	1182.5	1160	1134.01	1107.78	1084.64	1057.78	1030.51	1005.33	984.042	959.9	939.574	920.178	898.443	874.326	852.945	831.111	814.181	792.648	776.456	754.966	736.025	720.659	700.337	683.194	662.207	643.424	623.424	601.622	586.898	572.54	553.739	536.432	519.685	504.35	494.247	477.373	455.242	438.208	430.767	421.681
	5	1038.55	1046.9	1047.22	1043.27	1040.7	1036.75	1026.81	1018.24	1007.37	996.827	984.727	971.386	953.898	935.884	919.111	904.166	886.147	873.07	856.072	833.951	819.092	804.649	781.58	761.362	737.58	719.078	701.072	682.817	661.721	644.371	626.706	604.245	589.85	574.424	555.739	534.401	517.227	498.608	487.908	468.894	456.116	444.532	433.454	424.966	410.263	398.052	379.911	359.529
	6	1060.58	1064.22	1068.64	1073.42	1075.3	1078.12	1073.39	1074.17	1071.7	1069.63	1067.64	1064.2	1061.65	1058.89	1052.84	1047.9	1039.3	1033.41	1030.75	1026.51	1023.3	1016.94	1008.3	996.192	981.571	962.253	952.312	943.4	923.736	907.407	883.849	862.031	841.69	825.681	803.356	787.133	776.692	763.315	751.075	738.956	723.26	708.897	691.721	670.227	650.667	628.138	612.11	600.964
	7	697.907	704.167	699.334	696.163	690.295	688.207	680.275	673.69	668.504	663.206	658.689	656.297	646.022	640.312	630.544	611.802	600.022	581.558	567.569	550.016	537.173	523.749	508.908	494.787	479.071	462.567	450.623	435.607	423.855	412.554	401.127	390.897	376.693	366.666	357.866	349.821	339.395	327.497	322.816	316.064	309.734	303.598	297.409	294.944	288.501	282.929	279.716	276.13
	8	1178.05	1198.46	1213.92	1228.96	1234.38	1246.3	1250.1	1255.3	1259.31	1264	1265.23	1267.11	1265.82	1267.73	1261.3	1246.69	1235.82	1219.34	1204.34	1187.63	1171.84	1157.3	1140.21	1127.84	1112.66	1097.67	1079.27	1058.92	1038.93	1014.84	991.785	967.298	938.104	917.24	891.942	863.781	842.903	821.74	799.721	777.015	754.317	732.243	711.034	689.07	667.149	647.792	625.631	602.039
	9	892.308	894.763	887.336	877.571	877.97	882.809	888.122	891.672	888.098	880.631	874.553	865.775	856.477	850.389	845.058	835.309	816.999	800.945	782.196	764.549	746.793	728.185	713.487	697.633	680.236	663.757	645.716	628.263	607.188	590.782	576.465	564.981	546.895	532.19	523.091	513.276	500.965	485.145	466.923	451.087	440.752	429.451	421.277	408.67	395.086	382.155	376.91	368.971
	10	1054.33	1070.18	1086.66	1096.81	1104.89	1119.8	1132.11	1141.75	1140.51	1137.93	1133.78	1134.11	1133.44	1124.32	1123.33	1112.58	1099.39	1080.37	1059.37	1038.38	1011.28	982.853	954.33	933.721	908.415	886.693	858.617	834.225	810.467	785.399	761.471	735.869	708.92	683.239	659.102	635.786	609.931	586.923	568.394	551.257	533.133	514.609	492.791	488.096	475.766	463.148	452.11	436.42
	11	858.485	872.162	879.892	885.857	883.377	881.784	875.463	870.96	866.646	867.423	866.096	861.934	853.554	835.766	818.83	798.084	778.849	762.077	739.291	714.622	693.597	670.68	642.797	622.101	605.162	582.876	563.603	547.396	530.657	514.653	502.888	488.26	472.57	461.606	456.376	442.199	434.035	423.603	415.272	409.444	404.68	393.031	379.8	368.062	356.153	343.411	333.301	325.127
5%MVIC	1	957.128	970.365	978.538	982.522	986.015	992.074	995.1	993.173	996.675	996.483	990.757	986.664	979.421	978.706	975.851	968.706	958.207	950.852	936.489	926.964	912.364	903.467	893.122	879.194	861.354	842.524	824.225	807.015	788.905	771.49	758.672	741.901	726.515	707.027	689.428	675.217	658.641	639.276	621.26	607.332	591.277	580.075	569.986	557.42	543.326	533.458	519.629	506.834
	2	1372.74	1389.25	1395.82	1404	1416.26	1427	1430.07	1424.43	1414.02	1404.54	1389.99	1371.65	1350.46	1318.89	1292.36	1267.85	1242.99	1220.28	1191.16	1151.89	1112.65	1081.22	1052.75	1020.66	994.428	971.581	949.42	936.775	917.817	890.154	860.364	829.334	801.957	774.104	753.158	727.048	702.795	686.755	668.866	646.399	624.776	612.334	596.456	570.721	549.961	530.064	505.367	479.049
	3	698.483	708.728	713.292	719.112	724.785	728.327	732.11	732.768	738.779	734.239	727.595	718.597	708.525	700.902	696.128	688.05	677.043	664.691	650.493	632.687	618.423	607.393	593.401	574.78	559.27	545.687	531.585	516.911	500.805	485.666	473.144	456.828	443.774	428.36	415.294	402.781	392.29	389.847	383.589	371.628	367.537	358.599	346.62	343.281	337.111	331.222	318.907	308.869
	4	1309.79	1315.99	1317.76	1316.01	1302.45	1288.32	1271.15	1253.77	1236.13	1221.24	1204.18	1180.77	1158.13	1130.52	1101.61	1072.93	1042.98	1014.22	990.915	966.067	940.435	916.45	891.77	869.094	845.586	819.867	794.713	772.829	753.303	732.262	713.493	691.71	671.554	652.023	637.088	616.942	599.079	585.868	569.016	551.319	535.756	518.545	506.067	497.825	482.373	467.546	454.962	436.285
	5	1008.41	1013.5	1012.36	1014.5	1017.85	1021.73	1026.1	1032.72	1035.5	1020.31	1003.42	989.704	974.379	959.619	941.906	923.995	908.161	892.18	873.262	864.057	853.855	838.745	829.276	815.047	791.938	766.929	744.182	722.458	702.754	678.703	652.185	627.828	602.995	582.469	561.321	539.752	520.13	500.346	483.553	463.52	441.06	426.438	414.196	400.103	388.294	378.341	363.577	353.513
	6	1070.1	1082.25	1092.4	1101.3	1103.49	1098.36	1100.01	1098.6	1098.38	1094.93	1093.81	1091.71	1093.38	1090.46	1093.99	1090.47	1090.37	1085.26	1074.73	1064.29	1046.23	1030.74	1018.07	1003.44	990.629	977.094	962.429	948.041	926.483	913.065	893.994	875.301	854.545	836.593	820.569	805.877	788.648	772.439	761.187	751.633	739.564	721.153	705.614	685.815	672.945	652.942	624.802	601.278
	7	699.604	698.769	706.187	706.736	714.648	722.676	719.799	715.818	710.719	703.281	702.097	700.133	695.644	687.762	675.768	661.111	641.632	619.49	600.556	580.845	557.269	538.889	525.34	503.494	485.517	470.789	461.153	443.634	427.502	415.542	401.438	389.456	376.681	366.566	357.065	350.834	343.605	334.82	327.158	318.669	311.652	304.913	295.616	292.831	291.822	285.073	280.82	278.262
	8	1172.18	1192.63	1208.94	1219.62	1226.75	1232.84	1242.94	1248.98	1257.22	1266.04	1270.4	1272.91	1275.22	1277.17	1278.26	1270.6	1269.28	1263.32	1250.04	1232.71	1218.41	1198.12	1180.79	1161.03	1140.31	1118.45	1093.88	1070.74	1046.73	1019.06	991.027	967.563	936.25	909.615	886.496	860.413	834.031	812.253	788.677	766.623	749.366	726.65	702.494	682.509	659.855	636.041	618.49	591.708
	9	901.437	915.009	929.217	936.224	942.979	946.668	949.1	950.697	947.351	946.765	939.053	929.009	918.774	907.944	895.144	879.358	864.11	841.893	825.381	806.319	786.79	772.099	753.847	732.303	717.382	697.406	676.871	658.875	639.45	619.256	602.284	592.452	578.154	563.944	547.92	532.292	514.497	502.45	484.758	469.475	457.855	444.673	431.953	417.926	402.525	385.989	377.293	366.212
	10	1004.72	1021.42	1039.94	1058.9	1071.08	1085.07	1096.94	1105.36	1111.33	1116.27	1117.43	1120.81	1121.51	1122.39	1118.05	1113.74	1113.61	1104.14	1083.71	1061.41	1034.2	1003.36	971.224	941.212	910.336	875.955	843.962	817.363	794.812	768.064	743.768	721.183	699.508	673.388	649.998	625.575	605.315	583.219	563.003	543.933	530.958	520.294	506.979	490.518	478.861	465.41	456.671	444.951
	11	864.577	876.953	881.245	887.75	895.072	895.388	893.841	888.371	883.796	877.857	873.557	865.061	855.835	839.528	824.067	810.241	796.152	779.598	760.827	738.936	716.143	689.751	668.675	652.123	631.941	615.058	595.206	574.731	559.428	542.858	528.194	512.184	494.738	480.209	463.055	453.928	440.731	424.282	411.583	401.702	386.68	369.791	359.93	347.359	334.119	323.065	316.037	309.998
10%MVIC	1	949.555	958.246	962.177	968.092	975.743	987.65	991.862	993.111	994.135	992.468	982.9	978.732	973.721	973.189	967.348	959.572	961.735	957.986	949.995	943.908	929.784	907.557	889.667	867.339	848.608	825.382	805.937	792.462	771.948	754.614	744.24	732.104	710.923	687.619	665.182	643.215	629.576	615.517	600.294	583.956	570.412	557.833	543.065	535.733	524.418	508.387	494.762	482.254
	2	1354.34	1382.71	1405.71	1415.06	1408.33	1396.85	1385.67	1373.64	1361.34	1351.95	1339.18	1324.38	1310.89	1302.42	1287.94	1283.64	1271.57	1250.45	1224.58	1195.97	1163.9	1136.97	1107.29	1073.63	1045.87	1011.84	976.984	949.276	918.831	889.188	865.767	846.533	819.634	800.921	786.548	758.539	731.906	706.917	686.481	672.52	653.393	636.346	618.683	608.324	591.283	572.805	554.978	537.156
	3	716.325	728.737	739.491	745.994	750.667	752.462	753.097	749.605	741.416	735.3	724.951	718.357	708.06	697.773	682.667	663.946	650.788	645.96	643.44	635.487	627.293	619.566	610.912	604.496	593.252	574.899	559.898	541.876	522.117	507.578	485.741	465.098	449.298	438.784	431.422	424.369	417.251	412.225	401.304	395.258	384.389	376.425	370.462	364.777	354.048	339.837	326.599	309.259
	4	1327.34	1332.54	1327.83	1326.31	1325.85	1310.84	1288.96	1269.52	1249.93	1228.72	1208.35	1190.41	1168.29	1142.34	1114.96	1087.03	1054.07	1024.71	1004.25	976.654	950.153	923.76	896.923	870.418	849.675	823.26	802.924	783.125	761.274	740.705	718.022	695.56	679.95	662.03	642.701	627.994	608.923	588.777	571.579	559.562	542.126	525.985	510.632	499.327	481.359	463.908	445.032	422.177
	5	1024.17	1034.15	1037.36	1041.09	1044.35	1050.22	1054.33	1056.05	1048.22	1039.48	1026.9	1012.68	1002.13	986.114	973.315	957.157	941.811	923.327	901.484	884.039	866.646	842.807	825.542	803.387	781.375	761.706	743.232	721.829	702.676	685.452	662.928	645.792	627.203	605.026	587.453	572.623	551.962	531.363	510.954	492.181	477.155	457.155	438.208	424.079	410.573	393.584	375.903	363.929
	6	1031.2	1041.21	1049.14	1050.42	1054.01	1058.45	1062.44	1071.71	1073.77	1071.36	1066.74	1061.53	1056.41	1049.23	1040.06	1031.13	1027.03	1022.12	1015.53	1012.27	1007.6	1002.49	995.219	984.054	977.092	966.255	952.941	943.82	928.213	914.794	906.572	899.218	887.77	870.692	857.05	845.482	834.162	825.238	812.884	803.101	793.741	781.196	768.34	745.336	733.658	721.172	712.159	696.807
	7	726.296	730.835	735.054	741.244	744.784	745.057	744.78	742.124	735.447	722.196	716.182	709.101	695.838	687.03	672.258	655.76	640.549	630.588	615.631	602.802	583.989	562.809	540.351	518.513	500.108	482.49	464.49	452.24	439.682	425.272	409.389	393.852	381.415	372.407	359.73	348.874	339.828	332.365	322.708	312.714	308.119	305.744	301.297	296.748	293.589	287.679	280.668	274.556
	8	1197.34	1215.19	1231.11	1246.33	1264.05	1277.03	1289.7	1298.94	1301.53	1300.31	1299.27	1297.02	1296.57	1293.8	1285.89	1277.73	1272.72	1262.82	1251.21	1235.07	1221.53	1212.65	1197.3	1178.51	1161.46	1139.82	1114.87	1090.66	1065.54	1038.82	1007.62	980.61	954.214	930.015	910.317	886.175	861.948	835.993	815.422	790.028	764.779	740.865	717.267	691.227	669.24	644.271	622.473	600.076
	9	891.389	907.177	919.8	927.408	935.668	942.425	945.152	945.418	943.342	945.314	941.952	935.318	931.125	923.272	910.717	899.662	885.72	868.913	851.128	833.705	812.293	791.963	772.735	752.364	732.686	710.461	691.449	672.371	654.226	637.926	619.59	603.839	585.449	566.717	552.022	537.815	526.579	513.688	496.7	484.04	470.554	461.594	448.779	439.939	426.683	419.189	399.468	378.201
	10	1016.73	1033.95	1049.64	1062.21	1068.35	1076.63	1080.18	1085.46	1091.03	1092.11	1092.58	1091.74	1096.64	1090.21	1090.95	1099.72	1100.56	1099.34	1093.72	1079.44	1048.76	1019.43	989.892	957.455	931.235	899.731	876.113	854.611	830.567	801.443	777.416	747.668	724.512	704.436	678.329	653.494	632.801	610.626	589.211	568.545	548.539	532.249	519.905	502.786	484.553	466.818	444.756	430.113
	11	867.216	874.02	878.895	888.045	891.39	899.719	904.868	908.073	909.63	898.753	873.597	861.614	849.269	832.614	815.67	799.213	782.099	766.499	750.523	731.376	704.666	681.563	658.374	641.02	618.01	596.036	582.554	567.947	557.36	545.827	535.143	521.998	508.156	494.871	482.003	471.483	456.9	440.864	424.879	413.108	394.518	386.695	371.539	362.842	354.173	345.292	337.4	329.343
25%MVIC	1	999.977	1010.75	1018.38	1026.07	1029.56	1030.08	1027.01	1026.04	1031.64	1031.57	1032.9	1024.27	1009.71	998.334	990.073	977.944	963.98	943.893	930.189	917.9	902.251	887.188	871.704	864.531	853.171	842.232	832.603	818.243	805.198	793.364	778.843	762.374	746.372	731.358	714.235	695.094	685.903	668.718	649.475	626.031	613.8	593.291	564.52	534.83	510.437	485.05	465.424	441.601
	2	1370.25	1389.6	1402.17	1408.43	1413.86	1420.02	1425.31	1424.09	1413.92	1399.73	1385.07	1374.07	1365.33	1349.2	1330.9	1298.81	1266.83	1237.62	1211.09	1180.83	1151.92	1124.96	1094.7	1068.19	1046.1	1022.29	997.118	971.204	945.645	917.812	889.396	862.75	835.344	809.437	786.85	768.479	742.952	723.579	704.257	676.346	643.892	623.089	610.836	596.583	581.072	568.335	550.827	526.58
	3	718.58	723.23	726.189	727.153	727.139	731.214	732.308	737.606	735.278	733.601	734.441	730.713	728.069	724.621	715.557	711.941	709.005	703.511	694.219	676.634	665.116	647.217	628.364	615.106	598.16	583.863	569.98	549.315	534.087	517.972	497.433	481.938	471.984	460.247	448.197	432.917	419.752	404.55	400.816	397.107	390.15	381.667	375.153	366.294	353.437	348.893	334.39	318.402
	4	1303.09	1303.95	1300.82	1295.36	1293.03	1286.38	1270.43	1252.46	1238.92	1218.32	1195.5	1172.9	1149.5	1119.49	1090.81	1064.62	1037.39	1010.31	986.709	961.57	932.858	912.738	891.132	866.612	840.898	816.804	801.039	781.315	759.681	735.423	714.42	695.449	674.192	651.916	632.544	613.579	597.304	575.541	559.508	542.98	521.481	509.404	493.933	474.71	453.21	434.078	411.639	391.743
	5	986.223	990.633	995.343	1000.41	1009.14	1014.05	1016.57	1015.18	1018.33	1015.65	1015.65	1014.46	1009.73	1003.44	993.76	973.84	951.767	934.925	917.557	896.795	879.469	856.374	835.701	815.869	797.239	775.117	755.33	737.059	718.354	697.648	679.916	656.905	635.211	606.835	583.983	562.498	534.651	507.831	482.282	465.253	449.854	432.857	422.031	412.192	396.919	379.339	362.614	347.303
	6	1053.52	1062.02	1068.74	1075.8	1081.53	1077.32	1074.14	1079.34	1077.68	1076.45	1075.36	1074.34	1071.94	1070.79	1068.86	1066.51	1066.73	1057.04	1044.12	1031.71	1019.3	1006.03	992.797	984.239	969.769	951.686	939.182	922.703	910.487	897.764	883.444	874.32	867.34	863.784	854.427	838.894	826.353	820.657	813.093	802.404	790.472	778.536	762.478	741.438	723.807	706.101	687.572	671.055
	7	753.734	751.095	749.474	750.107	746.502	743.589	736.236	734.519	723.855	718.267	719.473	724.744	717.383	701.217	686.865	671.31	654.264	644.415	626.99	610.679	598.394	590.798	575.162	553.844	528.886	504.68	481.01	457.041	436.772	420.515	398.775	383.28	370.305	355.378	350.713	338.24	333.22	325.805	321.344	312.058	303.598	294.04	283.35	276.875	268.634	257.125	249.871	244.222
	8	1215.2	1248.99	1276.79	1300.89	1313.79	1322.22	1328.8	1331.54	1334.22	1340.44	1341.08	1343.56	1343.53	1337.63	1327.46	1316.9	1306.07	1294.26	1288.11	1278.2	1262.48	1243.67	1220.23	1193.88	1170.19	1143.46	1116.99	1094.76	1068.48	1038.01	1013.05	989.211	960.907	937.051	910.088	882.95	858.868	835.474	812.686	785.617	764.132	740.538	714.401	690.459	665.779	641.296	618.665	597.444
	9	952.152	960.301	963.004	963.68	969.889	975.59	982.635	985.656	994.349	990.166	980.94	965.529	953.7	940.848	928.378	917.701	905.912	885.331	868.487	847.596	822.973	805.419	789.382	769.49	753.992	734.747	711.881	693.813	674.505	656.849	638.988	618.488	606.053	591.013	579.045	561.968	547.798	526.789	510.288	498.806	484.593	470.532	457.28	443.931	425.829	401.479	374.363	347.52
	10	1006.85	1014.08	1023.54	1034.08	1044.24	1058.67	1070.55	1078.62	1088.97	1098.25	1099.97	1098.11	1103.89	1113.56	1116.72	1115.23	1112.67	1101.42	1081.82	1060.05	1039.19	1019.78	998.025	976.952	954.209	930.301	899.293	866.448	838.261	810.919	782.424	756.105	734.012	707.642	682.386	661.334	639.593	617.811	600.619	586.295	568.018	550.985	531.141	511.725	491.58	472.724	453.319	440.314
	11	873.692	879.996	888.762	909.146	923.821	931.532	928.669	925.81	919.593	915.366	906.273	894.065	881.164	871.154	851.909	830.378	807.713	783.423	768.139	750.33	733.334	712.7	689.715	671.78	651.351	637.905	625.237	611.383	594.442	582.06	570.06	561.14	546.551	531.808	514.725	496.891	481.456	467.594	450.99	433.342	418.296	401.529	383.377	366.938	347.991	337.68	324.647	315.099
50%MVIC	1	1008.43	1031.07	1045.74	1050.69	1051.01	1047.35	1048.4	1052.14	1051.43	1052.64	1055.69	1054.34	1045.9	1034.14	1023.81	1011.11	996.052	984.271	972.784	961.715	951.637	934.497	916.472	894.406	869.718	852.042	830.471	807.801	779.705	752.147	726.92	702.906	681.59	661.587	641.546	624.378	605.478	589.87	574.188	557.009	539.584	524.981	512.584	498.629	487.014	471.023	455.081	443.06
	2	1366.7	1389.15	1405.62	1419.64	1437.07	1439.88	1431.44	1420.82	1414.3	1401.47	1391.02	1383.13	1374.45	1353.19	1328.19	1308	1284.42	1262	1237.18	1211.75	1189.81	1165.24	1140.91	1106.66	1074.37	1046.58	1015.6	978.415	940.727	913.262	897.759	873.655	847.154	820.726	803.916	780.734	759.862	738.549	714.564	688.674	669.56	648.249	620.173	595.399	574.034	556.261	535.758	518.171
	3	714.153	726.875	734.689	742.595	747.309	750.25	754.252	751.28	751.173	748.342	747.011	742.196	739.895	737.669	733.663	730.59	723.748	715.709	702.05	693.248	680.651	671.496	661.279	650.365	633.844	609.133	586.195	565.226	547.727	529.845	508.607	495.335	480.929	465.61	452.493	442.069	431.289	422.37	413.584	406.757	400.592	396.852	388.619	380.474	367.164	354.665	344.124	335.343
	4	1286.92	1294.19	1298.89	1295.96	1289.32	1282.95	1271.92	1262.46	1256.11	1235.16	1213.28	1189	1168	1146.99	1122.79	1097.48	1075.59	1056.82	1032.17	1012.02	995.736	978.869	958.018	939.573	915.361	887.767	857.521	834.927	810.138	786.387	764.986	740.57	719.984	699.579	682.684	664.349	643.876	623.125	601.719	582.763	563.29	544.836	528.315	508.343	495.974	478.81	464.707	452.353
	5	1026.22	1031.59	1038.4	1044.33	1045.94	1042.64	1035.91	1037.05	1035.81	1028.23	1014.72	1004.46	994.903	985.687	974.327	963.051	954.608	945.424	932.599	920.925	906.771	887.55	870.171	849.41	829.228	809.203	785.8	761.656	741.271	717.582	690.408	667.593	646.054	624.981	603.116	579.832	556.962	535.856	515.11	497.315	477.199	466.261	455.332	441.987	429.226	418.851	407.261	396.285
	6	1037.86	1046.57	1054.95	1058.69	1060.39	1063.93	1064.97	1064.42	1064.86	1064.14	1059.6	1057.99	1059.05	1056.21	1050.65	1048.24	1042.68	1035.32	1024.83	1015.64	1003.07	990.98	975.664	964.536	952.539	946.959	936.806	926.392	914.525	903.584	893.729	883.971	872.881	861.198	849.687	840.042	824.874	814.392	804.214	796.792	786.17	777.871	767.207	752.747	740.958	727.032	711.005	697.783
	7	713.891	718.105	710.732	706.593	707.366	703.28	699.878	694.489	691.402	687.369	672.68	666.851	655.938	639.76	625.628	614.323	600.621	586.918	574.397	561.87	542.241	521.368	503.515	485.889	469.938	454.09	439.172	419.225	407.476	397.329	387.536	381.218	374.886	366.043	359.486	353.788	348.042	341.022	337.308	329.765	325.025	319.323	311.159	307.258	304.563	303.2	299.509	292.971
	8	1238.18	1264.96	1287.94	1302.71	1310.86	1313.84	1314.61	1311.45	1310.32	1308.7	1306.98	1306.15	1303.07	1302.66	1304.24	1301.25	1301.26	1290.14	1277.43	1255.93	1231.17	1207.03	1184.56	1162.34	1139.64	1114.78	1098.89	1078.21	1058.62	1038.98	1016.59	992.344	966.394	938.075	911.731	887.027	862.799	838.035	815.924	798.02	778.742	752.275	727.071	701.233	676.135	651.839	625.364	597.682
	9	936.674	944.339	956.196	963.686	966.644	965.24	967.479	968.653	965.913	970.941	971.136	970.497	967.269	962.508	952.531	936.349	919.464	899.359	880.967	860.887	841.762	824.585	807.395	790.8	772.205	751.507	726.991	707.62	686.922	661.335	638.88	621.802	599.754	579.933	558.923	540.654	522.41	500.877	483.308	465.528	450.079	437.782	425.33	412.057	392.327	372.025	343.647	329.863
	10	996.605	1016.09	1035.23	1053.38	1063.06	1072.29	1079.22	1086.03	1096.6	1106.57	1114.42	1122.26	1128.96	1129.25	1129.73	1131.45	1129.71	1131.28	1127.55	1113.09	1094.75	1075.49	1051.62	1026.73	1006.29	983.801	959.194	929.799	899.003	866.238	829.236	799.518	767.208	734.001	703.699	674.498	648.158	619.128	594.674	573.877	552.716	534.253	512.8	492.957	473.086	453.454	435.507	418.01
	11	891.4	906.711	918.948	930.736	941.325	952.303	950.545	939.755	931.083	918.382	910.564	898.959	886.159	876.173	862.203	846.33	825.648	809.398	790.387	765.135	742.574	719.924	699.441	678.288	653.839	630.407	609.321	588.692	565.482	548.16	531.67	514	495.531	481.215	466.718	452.034	439.076	429.188	417.413	404.021	383.601	363.113	350.128	335.393	319.928	309.132	294.285	280.236
[truncated: 2 more columns]

## Sheet: B)Thickness
Muscle thickness (mm)		% Muscle length
	Participant	25	26	27	28	29	30	31	32	33	34	35	36	37	38	39	40	41	42	43	44	45	46	47	48	49	50	51	52	53	54	55	56	57	58	59	60	61	62	63	64	65	66	67	68	69	70	71	72
0%MVIC	1	25.7121	25.9579	26.1461	26.3747	26.4547	26.52	26.514	26.5084	26.4701	26.4877	26.514	26.4706	26.3708	26.2793	26.1986	26.0786	25.9234	25.8145	25.604	25.3804	25.0916	24.8644	24.5818	24.2059	23.9523	23.7587	23.5576	23.3732	23.2126	22.9834	22.8064	22.5715	22.4286	22.2595	22.0664	21.9076	21.6393	21.2934	21.0609	20.803	20.5526	20.1764	19.8953	19.7277	19.3584	19.0981	18.7525	18.3723
	2	33.0101	33.0332	32.9775	32.9443	33.0184	33.0372	33.0489	33.0833	33.1071	33.0162	32.986	32.9106	32.81	32.7148	32.6066	32.3896	32.1347	31.7195	32.6545	30.742	30.3106	29.8718	29.3489	28.9726	29.7722	28.2615	27.8652	27.4946	27.1178	26.7113	26.3177	25.9174	25.6859	25.4216	25.2435	24.9521	24.6727	24.4345	24.1794	23.7327	23.4237	23.0143	22.638	22.2072	21.7586	21.3873	20.9951	20.6427
	3	31.412	31.5459	31.7276	31.8115	31.8183	31.7734	31.7728	31.7813	31.8225	31.8579	31.9692	32.0596	32.0588	32.012	31.9022	31.751	31.5407	31.3555	31.0891	30.9097	30.6539	30.4515	30.2763	30.0948	29.9182	29.7089	29.5373	29.2844	28.9488	28.5742	28.1447	27.6933	27.3105	26.8693	26.4301	25.9843	25.5414	25.0811	24.6373	24.1908	23.7658	23.3432	22.9638	22.6014	22.25	21.7634	21.3483	20.8632
	4	26.7006	26.865	26.7387	26.4603	26.4539	26.834	26.8505	26.7787	26.6109	26.4765	26.4682	26.5998	26.5976	26.5918	26.5307	26.4611	26.1619	26.031	25.7685	25.1949	24.8304	24.8274	24.5484	24.1091	23.7964	23.4536	23.2855	22.9956	22.7847	22.4531	22.1241	21.7587	21.4142	21.1718	20.8452	20.477	20.228	19.8065	19.5713	19.3945	19.0971	18.6073	18.2882	18.2948	18.4037	18.5028	18.4493	18.1125
	5	26.4076	26.7372	26.9946	27.2112	27.3965	27.5409	27.5674	27.6275	27.714	27.7718	27.7718	27.8776	28.0196	28.0724	28.1229	27.9713	27.8595	27.6187	27.4298	27.2769	27.1125	26.8557	26.6802	26.7299	26.5076	26.351	26.0439	25.9122	25.6503	25.2746	24.947	24.7072	24.3405	23.9964	23.634	23.2627	22.7618	22.3325	21.958	21.6259	21.3031	21.0099	20.5698	20.2739	21.0832	19.5146	18.9728	18.4117
	6	23.7241	23.9699	24.183	24.3125	24.51	24.6217	24.6238	24.5894	24.5199	24.4217	24.3369	24.2787	24.2262	24.112	23.8206	23.5328	23.3789	23.163	22.8761	22.689	22.3754	21.9877	21.6783	21.3963	21.1565	20.8931	20.72	20.4092	20.0813	19.6858	19.4867	19.0838	18.8068	18.5699	18.3886	19.319	18.1667	17.7818	17.8619	17.8106	17.5873	17.7824	16.811	16.4646	16.1539	15.8549	15.6085	15.4355
5%MVIC	1	27.3472	27.5777	27.7251	27.7964	27.8976	28.0695	28.0765	28.0844	28.1071	28.0675	28.0565	28.0927	28.0608	28.1218	28.144	28.1557	28.0552	27.9667	27.8973	27.7616	27.586	27.4683	27.4589	27.3172	27.118	26.8693	26.5949	26.3006	26.115	25.8144	25.5928	25.3083	24.9636	24.6174	24.2813	23.9328	23.6281	23.2665	22.9826	22.7826	22.4778	22.1913	21.915	21.6317	21.3814	21.1529	20.8467	20.4997
	2	33.3791	33.3473	33.3373	33.3164	33.342	33.4055	33.3656	33.232	33.1374	33.135	33.1116	33.0331	32.9225	32.7912	32.6377	32.5008	32.3707	32.0712	31.9444	31.6965	31.2482	30.8351	30.5219	30.3204	29.9681	29.4135	28.8659	28.2988	27.77	27.3213	26.8025	26.3934	26.1223	25.7867	25.3245	24.9169	24.4698	24.1759	24.0015	23.7612	23.613	23.4493	23.2387	22.751	22.3944	21.9868	21.6372	21.2838
	3	31.9353	32.2603	32.4179	32.4814	32.4389	32.4027	32.5732	32.7528	33.0282	32.9452	33.0776	33.1869	33.2875	33.3154	33.3359	33.3358	33.3076	33.0633	32.8748	32.6054	32.6226	32.1988	31.9289	31.6034	31.2943	30.9234	30.5628	30.2225	29.7873	29.366	29.0714	28.5871	28.1201	27.6495	27.2539	26.8001	26.36	25.8773	25.452	25.1498	24.6584	24.2087	23.687	23.0545	22.5144	21.9321	21.4464	21.0858
	4	26.3485	27.285	26.9319	27.2677	27.3706	27.2659	27.3492	27.3052	27.2116	27.3397	27.1467	26.9586	27.0259	26.7623	26.7232	26.8953	26.6638	26.4932	26.1559	25.989	25.8556	25.6057	26.6674	25.0298	24.8475	24.4597	23.9892	24.9811	22.9491	22.8766	22.6882	22.1675	22.0652	22.0508	21.8877	21.3355	20.552	19.851	19.2774	20.2391	18.7664	18.6235	18.438	18.0025	17.4545	17.3726	17.3468	17.1607
	5	26.8712	27.2205	27.5829	27.7688	27.9831	28.0945	28.3276	28.3942	28.4496	28.4708	28.4804	28.5723	28.6078	28.6956	28.7752	28.9096	28.62	28.3447	28.0594	27.7963	27.6237	27.5061	27.3137	26.9882	26.9439	26.8259	26.5345	26.3216	26.1134	25.9001	25.5201	26.7968	25.1141	24.8202	24.3223	23.8151	23.5857	23.4584	23.0279	22.6994	22.2671	21.7721	22.8608	21.081	20.6724	20.0471	19.6841	19.1632
	6	24.0953	24.2885	24.4597	24.5917	24.6362	24.6789	24.6441	24.6574	24.5645	24.5837	24.6092	24.4305	24.3431	24.2052	23.98	23.8441	23.5801	23.3452	23.1745	22.9869	22.7193	22.2445	22.1255	21.9383	21.6224	21.3736	21.1631	20.9065	20.6328	20.2618	19.9707	19.7106	19.3435	18.9326	18.3876	18.3105	18.159	18.0988	17.7199	17.5746	17.3338	17.1113	16.7654	16.4591	16.0164	15.7964	15.5749	15.3438
10%MVIC	1	26.741	26.9976	27.1876	27.3418	27.5407	27.6355	27.7005	27.8111	27.8718	27.8597	27.8448	27.8488	27.8167	27.8607	27.8473	27.8029	27.7744	27.8048	27.8251	27.6644	27.3566	27.191	26.912	26.5772	26.2393	26.0055	25.6452	25.3378	25.0248	24.7497	24.5007	24.2111	23.8779	23.5137	23.1929	22.9797	22.6828	22.4495	22.1163	21.8209	21.7046	21.4917	21.3006	21.2255	20.989	20.7771	20.4346	20.0695
	2	34.0945	34.3064	34.4442	34.4062	34.3192	34.2391	34.1464	34.0864	34.0157	33.9595	33.8473	33.7788	33.7573	33.7779	33.8397	33.7636	33.6113	33.2946	33.0476	32.724	32.2627	31.8227	31.4422	32.0296	30.5651	30.0315	29.4958	29.0479	28.5471	28.1572	27.6715	27.3352	28.2882	26.4138	26.0648	25.6804	25.3124	25.0234	26.3584	24.4033	24.1191	23.8428	23.6316	23.3786	23.0842	22.905	22.6053	22.3208
	3	32.0765	32.1986	32.2562	32.5238	32.6563	32.7167	32.8167	32.939	32.9147	32.8834	32.8982	32.9472	32.9795	32.8928	32.93	32.891	32.8716	32.8346	32.6955	32.6252	32.4871	32.3121	32.0961	31.927	31.6994	31.3665	31.1384	30.8825	30.3778	29.941	29.4494	28.9242	28.3464	27.9354	27.5574	27.0986	26.6223	26.0774	25.6807	25.2103	24.7583	24.2844	23.758	23.0621	22.5468	22.1074	21.6773	21.1956
	4	26.3147	26.6064	26.7427	26.7454	26.8842	27.1478	27.1909	27.2023	27.3847	27.3648	27.3255	27.293	27.344	27.2702	27.1294	27.1374	26.8731	26.6347	26.5663	26.5416	26.4367	26.169	25.9199	25.5352	25.215	24.587	24.3558	24.3078	24.0423	23.4592	23.0561	22.7937	22.1605	21.8539	21.8523	21.5476	21.2248	20.6748	19.9341	19.5368	19.0891	18.7771	18.5559	18.3962	18.0651	17.5234	17.1441	16.8811
	5	27.8358	28.0483	28.2634	28.4324	28.5774	28.5193	28.5079	28.583	28.5645	28.6325	28.683	28.7125	28.7831	28.9457	28.9314	28.8956	28.8863	28.859	28.696	28.4695	28.2127	27.9429	27.6895	27.6166	27.5142	27.3011	27.1848	26.877	26.1977	26.2216	26.1757	26.126	25.7632	25.173	24.5207	24.0838	23.7555	23.3828	22.9874	22.6952	22.3084	22.1525	22.0866	21.601	21.0081	20.3764	19.9431	19.4267
	6	23.8112	23.9672	24.148	24.2202	24.2577	24.476	24.4477	24.6468	24.854	24.7626	24.545	24.4949	24.331	24.2061	24.083	23.8282	23.6477	23.5925	23.4445	23.2619	23.0928	22.7878	22.5294	22.2892	21.95	21.68	21.3876	21.1377	20.9052	20.6723	20.3837	20.0504	19.8377	19.5467	19.2568	18.9928	19.7939	18.4406	18.2538	17.8841	17.6585	17.4421	17.1428	16.8732	16.6444	16.9518	16.1015	15.8373
25%MVIC	1	27.5182	27.7535	27.9775	28.1378	28.2865	28.4232	28.5484	28.6648	28.7593	28.8299	28.9745	28.9706	28.9253	28.8441	28.7132	28.5731	28.396	28.2255	27.9313	27.7021	27.4359	27.2516	27.2065	27.0802	26.7942	26.543	26.2907	26.1506	26.0554	25.8827	25.6553	25.4304	25.1268	24.8414	24.6345	24.345	24.1212	23.7454	23.3512	23.1782	23.0056	22.639	22.1799	21.7515	21.3202	20.5947	20.128	19.623
	2	35.0406	35.0512	35.0275	34.9976	34.9913	34.956	34.9027	34.7588	34.6067	34.4787	34.3817	34.283	34.1771	34.023	33.7941	33.4725	33.2746	33.0195	32.6718	32.3468	32.0092	31.6189	31.3555	31.0788	30.7729	30.3271	29.8294	29.3694	28.9528	28.4905	28.0542	27.5703	27.1891	26.7744	26.3983	26.0186	25.7036	25.4159	25.1114	24.8254	24.3718	24.049	23.7681	23.4614	23.1977	22.8524	22.4509	22.1069
	3	33.6236	34.1726	34.4578	34.5933	34.5068	34.6517	34.8161	34.7807	34.9059	35.0652	35.163	35.2904	35.3631	35.374	35.2673	35.0587	34.8665	34.7385	34.5611	34.5385	34.1798	33.7223	33.4269	33.1146	32.651	32.3127	31.9221	31.5469	31.1828	30.8354	30.3499	29.9645	29.5311	28.952	28.3069	27.901	27.3947	26.9155	26.4359	25.9362	25.4155	25.1107	24.6022	23.9153	23.4124	23.0562	24.0484	22.024
	4	26.9137	26.8821	26.9863	27.1557	27.2329	27.3106	27.4244	27.5766	27.5511	27.5919	27.6561	27.5922	27.5142	27.419	27.4454	27.241	27.0661	27.1937	27.0759	26.6884	26.1767	25.9842	25.8988	25.6695	25.388	24.8322	24.6154	24.3807	23.8924	23.4808	23.1701	22.8837	22.6401	22.4686	21.9994	21.569	20.7756	20.5247	20.0709	19.6843	19.3879	19.1145	18.7982	18.4581	17.9117	17.3029	16.826	16.3578
	5	28.3675	28.535	28.6782	28.8605	28.9796	29.125	29.2464	29.4163	29.4302	29.4449	29.6909	29.8372	29.7928	30.0532	30.2082	30.2395	30.2469	30.1309	29.6469	29.345	29.0525	29.0631	28.984	28.6205	28.2182	27.9531	27.5358	27.1923	26.6423	26.3942	26.4554	25.9878	25.6432	25.4992	25.1663	24.7098	24.3789	25.2141	23.7587	23.3898	23.1868	22.8666	22.73	22.3843	21.8346	21.2195	20.7999	20.779
	6	24.3468	24.7394	25.0792	25.3238	25.2606	25.3033	25.3442	24.7498	25.297	25.3444	25.2942	25.1748	24.9997	24.8436	24.6641	24.3748	24.2487	24.1087	23.9021	23.6866	23.5032	23.2704	22.9684	22.649	22.4739	22.2294	21.9606	21.6497	21.3635	21.192	20.9959	20.8091	20.4687	20.1483	19.7469	19.4908	19.2451	18.9465	18.5723	18.4436	18.4132	17.8198	17.5612	17.4335	17.1416	16.7803	16.2614	15.9848
50%MVIC	1	28.8045	29.2	29.4518	29.612	29.7346	29.8772	30.0288	30.0824	30.1713	30.2116	30.2123	30.2841	30.1792	30.1122	29.9324	29.6697	29.527	29.5222	29.3398	29.0494	28.6688	28.2741	28.0246	27.6601	27.3814	26.9975	26.6509	26.3085	26.0707	25.6903	25.0161	24.3642	23.8576	23.5203	23.1709	22.8993	23.7453	22.4266	22.1202	21.8441	21.5443	20.9189	20.2421	20.2427	20.4443	20.4225	20.2643	19.8323
	2	36.452	36.4375	36.3693	36.3607	36.2301	36.0315	35.8671	35.7423	35.5922	35.5128	35.3087	35.1868	35.0733	34.8576	34.6622	34.4776	34.3302	34.1914	33.9537	33.7416	33.5973	33.334	32.9421	32.4045	31.8909	31.458	30.9948	30.3431	29.6745	29.334	29.0405	28.6778	28.4226	28.1039	27.7177	27.1965	26.7693	26.2446	25.7505	25.3387	24.7826	24.2144	23.5989	23.2962	23.0897	22.8912	22.7633	22.4937
	3	33.6439	33.8822	34.2001	34.3435	34.3651	34.29	34.2739	34.2523	34.2468	34.5264	34.6339	34.6124	34.7791	34.7684	34.9135	34.9778	35.1149	35.018	34.8863	34.4924	34.1366	33.8224	33.6127	33.2364	32.9977	32.6834	32.5492	32.3183	32.0176	31.7568	31.3301	31.1166	30.492	29.9372	29.3799	28.7488	28.2487	27.5848	27.0886	26.6246	26.2169	25.8141	25.2722	26.3414	24.0999	23.4105	22.8471	22.3342
	4	27.8505	28.1491	28.3384	28.3191	28.4777	28.5415	28.5559	28.5809	28.7299	28.8029	28.6856	28.7519	28.5353	28.4354	28.8612	28.5842	28.3811	28.1211	27.8527	27.7169	27.6585	27.4142	27.2426	26.9091	26.3208	26.1564	26.0828	26.51	26.0705	24.3848	23.5407	23.2026	22.8176	22.1214	21.6607	22.1493	20.6152	20.5062	19.8629	19.5071	18.9576	19.5581	18.0203	17.7176	17.3651	16.9989	16.9006	16.4177
	5	27.4402	27.6917	27.9503	28.2113	28.4249	28.6312	28.8068	28.9657	29.2646	29.4473	29.7035	29.9407	30.1566	30.3156	30.2979	30.4519	30.5342	30.5425	30.577	30.4464	30.1558	29.6607	29.2987	28.9443	28.7334	28.3341	27.9845	27.6583	27.249	26.7759	26.2229	25.8921	25.6115	25.2559	24.6355	24.1826	23.8344	23.4462	22.9113	22.4071	22.1592	21.6192	21.2883	20.676	20.3141	19.9259	19.9367	19.5061
	6	24.5802	24.8524	25.1523	25.4302	25.603	25.7606	25.7686	25.6779	25.637	25.6283	25.6283	25.5447	25.5977	25.4271	25.2696	25.1302	24.9105	24.7086	24.4147	24.1039	23.7755	23.4166	22.9924	22.5991	22.352	22.0807	21.508	21.2953	21.0501	20.8107	20.3406	19.8696	19.6592	19.5966	19.2529	19.0428	18.8825	18.5448	18.3781	18.2325	18.0776	17.7449	17.4081	17.0015	16.6731	16.3538	15.8279	15.5407
[truncated: 2 more columns]

## Sheet: C)Width
Muscle width (mm)		% Muscle length
	Participant	25	26	27	28	29	30	31	32	33	34	35	36	37	38	39	40	41	42	43	44	45	46	47	48	49	50	51	52	53	54	55	56	57	58	59	60	61	62	63	64	65	66	67	68	69	70	71	72
0%MVIC	1	45.6712	46.363	46.1143	46.0748	46.5629	47.0313	47.3609	47.1435	47.3881	47.0656	47.3853	46.774	46.688	46.4918	46.3605	46.2293	45.2069	45.2334	45.1868	43.3824	43.5952	44.3244	43.8413	42.552	42.0094	42.3742	40.9044	40.3569	40.0097	39.224	38.801	38.3912	37.9565	37.3489	36.8888	36.359	35.7762	35.256	34.6059	33.915	33.2879	32.8644	32.5231	32.0264	31.4948	30.7288	30.0878	29.5512
	2	46.0155	46.3397	46.5993	46.8825	46.9656	47.2546	47.2501	47.1677	46.9284	46.5619	46.1246	45.697	45.6691	45.4961	45.0961	44.7739	44.1864	43.6023	42.9741	42.2618	41.8352	40.9696	40.2231	40.1688	39.6487	38.8245	38.2387	37.7247	37.2379	36.7135	35.7326	35.0939	34.8113	34.2857	33.5894	33.1607	32.5069	31.9102	31.6888	31.7071	30.8145	30.15	29.8106	29.0768	28.5431	28.1646	27.3818	27.0078
	3	51.1077	51.6045	51.7396	52.5249	52.3284	52.0489	51.449	51.5975	51.7345	51.2728	51.1559	50.5882	50.241	50.6203	50.5268	49.8128	49.8467	49.5153	49.2649	48.6834	48.2452	47.7548	47.2829	47.4815	47.12	46.7895	46.3624	45.5875	45.5997	44.8997	44.1867	43.6068	42.784	42.0925	41.185	40.0906	39.5809	39.6998	39.2453	38.3126	38.0918	37.9156	37.2759	36.5591	36.0729	35.6353	35.4368	35.1148
	4	43.6722	43.5129	43.2785	43.1145	43.0022	42.7611	42.581	42.3532	42.277	42.1462	42.0375	41.8928	41.6535	41.4882	41.3864	41.1288	40.509	40.1744	40.1385	39.4347	39.1937	38.8024	37.6541	37.5721	37.2697	36.8999	36.0203	35.7458	33.4171	33.381	34.2459	34.2078	32.9549	31.8877	33.1047	32.7885	32.5175	32.5399	31.7091	30.8825	30.054	29.7255	29.2786	28.363	27.1191	25.5769	25.2897	25.215
	5	49.292	50.3522	51.2327	51.9709	52.7339	53.8471	55.4974	55.648	54.5581	54.865	55.2119	54.9431	54.1485	54.5035	53.3918	53.6102	53.4319	52.2665	52.3023	50.8299	49.5246	49.1455	48.5402	46.0189	46.1975	44.6616	43.4626	41.0529	40.1294	39.2963	38.7897	37.8482	36.69	35.5563	34.3167	33.2314	32.9657	32.7557	32.1018	31.5124	31.1174	30.4562	30.681	30.5058	30.3036	30.1733	30.406	30.3278
	6	41.3599	41.5047	41.7807	42.2974	42.9731	43.3137	43.1021	43.0417	42.6729	42.8149	43.0583	42.828	42.4175	41.6256	41.1694	40.757	40.3441	39.8129	39.2082	38.4969	37.8197	37.2946	36.6591	35.8475	35.2123	34.396	33.4624	32.5148	31.9217	31.5877	31.2651	31.0137	30.5058	30.4761	30.1857	29.6896	29.3081	29.2093	29.0495	29.0865	29.0117	28.7021	28.524	27.721	27.0606	26.7535	26.0643	25.9881
5%MVIC	1	40.6933	41.3296	42.0375	43.0126	42.9957	43.2776	43.7503	43.6608	43.8146	44.1445	44.1759	43.6022	43.0547	42.5636	42.6901	41.6774	41.4075	41.0353	40.7273	40.3523	39.9835	39.9445	39.6893	38.9871	38.3495	37.9596	37.6881	37.2878	36.8857	36.663	36.1593	35.6903	34.9677	34.4457	34.1367	33.6317	33.1931	32.9622	32.7265	32.5882	32.411	32.1529	31.6932	31.2646	30.9175	30.7754	30.4145	29.9255
	2	45.6077	45.8372	45.8414	45.9158	46.1668	46.59	46.7423	46.9268	46.779	46.6397	46.3974	46.1878	45.9006	45.3837	44.8713	44.6048	44.1062	43.6452	42.9661	42.215	41.3879	40.5478	40.1942	39.6959	39.2279	38.7898	38.4781	38.5062	38.1126	37.6409	36.9422	36.1936	35.4146	34.6115	34.3899	34.017	33.3613	33.0255	32.3983	31.4764	30.5615	30.2829	29.9284	29.1819	28.4449	27.4552	27.0985	26.2559
	3	49.5579	49.3618	49.4271	49.8503	49.7982	49.345	49.3552	49.0879	49.3098	49.5339	49.8815	49.7916	49.7586	49.7573	49.4001	49.4848	49.3136	49.2131	48.8775	48.3491	48.0549	47.7765	47.212	47.2829	46.8614	46.4823	46.2968	45.5702	44.4627	44.4379	44.3456	43.4632	43.008	42.1058	41.9182	41.7027	40.1449	38.9515	38.6786	38.8653	38.7957	38.2745	37.5903	37.6888	37.4926	37.2505	37.2428	36.925
	4	44.2879	44.595	44.6363	44.5943	44.5547	44.722	44.9819	45.107	45.0455	45.0393	44.7925	44.4026	44.4423	44.2133	43.7884	43.3502	43.0308	42.5514	41.3843	41.0509	40.7568	39.8661	39.496	39.0874	38.2093	37.8086	36.565	36.2934	35.8353	35.0032	34.8109	34.5181	34.8038	34.6279	33.8929	32.7776	32.198	32.4185	32.3095	31.6414	31.5387	31.4908	30.283	30.0538	29.0834	28.2769	27.3108	26.9448
	5	49.0495	49.99	49.7743	50.4809	50.7503	52.1249	52.2861	52.7281	52.2147	52.5693	52.5506	52.3925	52.2113	51.7239	51.4506	50.6096	52.0229	52.3379	51.9655	51.391	50.7028	49.5198	47.3533	46.3927	45.7849	43.5582	40.5011	40.8296	39.2302	37.8753	37.0445	36.3483	35.5083	34.7362	33.4478	32.6025	32.3012	31.5564	31.0317	30.6362	30.331	30.0492	29.7058	29.2158	29.3163	29.0103	29.201	29.4207
	6	41.8474	42.0655	43.2166	42.9742	43.3124	43.6686	43.82	44.2819	44.2243	44.0235	44.1357	43.7471	43.1748	42.3224	41.7832	41.3899	40.7966	40.1575	39.6549	38.8952	38.1758	37.5672	36.9626	36.2908	35.666	34.9791	34.3206	33.5822	32.963	32.4074	31.9452	31.1313	30.3418	29.9563	29.6201	29.599	29.352	28.796	28.298	28.4401	27.9423	27.4657	27.0321	26.851	26.3287	26.2327	25.9249	26.1661
10%MVIC	1	43.4778	43.7773	44.0159	44.4873	45.1812	45.6203	45.7094	45.8439	45.9061	45.6032	44.594	44.6786	44.8259	44.8416	43.6058	43.601	44.0334	43.8768	43.1524	42.4683	41.6868	40.8986	40.651	39.9642	39.3954	38.9836	38.4562	38.0642	37.6582	37.1641	36.6639	36.3001	35.7893	35.1863	34.6422	34.1482	33.8383	33.5626	33.0123	32.8847	32.7181	32.2085	31.6892	31.3752	30.7532	30.0287	29.825	29.6847
	2	46.1087	46.6365	47.0415	47.3091	47.1046	46.7506	46.5462	46.2038	45.964	45.6689	45.307	45.0238	44.6097	44.2988	44.1061	43.8738	43.6378	43.1378	42.5628	42.1675	41.6049	41.2643	40.4855	39.9604	39.4324	38.77	38.2272	37.6372	36.7782	36.4131	36.2811	36.0478	35.8421	35.4719	34.96	34.1689	33.4639	32.7108	32.4863	32.061	31.4341	30.8856	30.0126	29.3825	28.7482	28.4563	28.0987	27.7995
	3	48.9109	48.9974	49.3156	49.6265	50.1543	50.4785	50.5706	50.6627	50.5668	50.5476	50.3307	49.8489	49.6628	49.7533	49.544	48.8814	48.5897	48.271	48.2454	47.8765	47.7219	48.0628	47.8717	47.2882	47.0463	46.2868	45.616	44.6242	44.3502	44.4328	43.1161	41.8785	41.8103	42.1449	41.7093	40.9397	40.3327	39.6428	39.3652	38.3658	38.1143	37.8993	37.6761	37.1737	36.3159	36.1117	36.1056	35.3024
	4	43.3396	43.4731	43.5246	43.4046	43.6439	43.7242	43.6521	43.6887	43.8648	43.966	44.1447	44.1428	43.9631	43.7184	43.3854	43.0119	42.7114	42.3497	42.053	41.6859	40.8169	40.328	39.3535	39.0262	38.9526	38.2992	37.5696	37.0829	36.6196	35.8307	35.3375	34.9112	34.8687	34.3118	33.9244	32.9468	32.9016	32.6195	32.7126	32.9322	32.7652	32.5052	31.8489	31.7864	30.495	30.581	29.3545	27.7713
	5	48.5222	49.2645	49.7188	50.4219	50.592	51.0349	50.7774	51.0562	51.4796	50.7175	51.0849	51.355	51.1055	49.9135	50.1298	51.1358	51.0934	49.8888	49.4461	49.0133	48.6233	48.4189	47.4773	46.5661	46.1957	42.7715	42.0133	41.1502	40.1638	39.2952	37.8483	36.81	35.7401	34.8224	33.6726	32.9757	32.3754	31.9405	31.2032	30.9819	30.4751	29.8662	29.187	28.5107	28.1875	28.0248	27.7348	27.6313
	6	42.0816	45.0129	45.418	44.262	45.0655	46.0374	46.0952	46.5227	46.7882	46.6216	45.6346	43.0631	42.5059	41.7048	40.912	40.4027	40.0908	39.5372	39.1976	38.7115	37.8169	36.9244	36.264	35.6295	34.9283	34.247	33.5385	33.0173	32.619	32.155	31.8148	31.6567	31.3848	30.8993	30.4254	30.1152	29.8226	29.3176	28.9201	28.6822	27.8988	27.5301	27.2781	27.1407	26.9253	26.5267	26.5622	25.6581
25%MVIC	1	45.2839	45.7195	45.9405	46.1628	46.5509	46.8915	46.7971	45.816	45.3455	46.0923	45.9008	45.9959	45.8447	44.9961	44.9309	44.8061	44.4989	44.6356	43.8981	43.8969	43.7419	42.8415	42.8153	42.2162	41.7845	41.2745	41.097	41.0076	39.5802	39.0782	38.5937	37.7956	37.3563	36.6335	36.18	35.8044	35.263	34.8582	34.2601	33.5095	32.5294	31.9013	31.4871	30.6305	29.9423	29.2458	28.7956	28.2554
	2	45.1079	45.5794	45.6451	45.7495	45.9956	46.3168	46.433	46.5852	46.4077	46.1353	46.0618	45.8403	45.5813	45.4071	45.1478	44.5062	43.953	43.4567	43.054	42.5615	42.0159	41.5192	41.1663	40.5593	39.9998	39.6631	38.8032	38.3235	37.7605	37.0542	36.6738	36.1365	35.2024	34.8332	34.1042	33.6543	33.0109	32.1843	31.3097	30.0032	29.0854	28.9554	28.8097	28.3865	27.6822	27.3715	26.8792	26.0927
	3	47.3606	48.3706	48.7616	49.1167	48.9274	48.8624	48.9221	48.6196	48.5524	48.4416	48.4717	48.3559	48.2296	47.876	47.9778	47.9855	47.5866	47.1981	47.5017	47.434	47.0873	47.1098	46.7526	46.3462	46.1384	45.6592	45.516	45.2661	44.7607	44.2606	43.6451	42.9539	42.3917	42.1232	41.357	40.8169	40.494	39.9027	39.4053	39.0974	38.8524	37.2803	36.2694	36.3014	35.7982	35.4636	35.1177	34.9488
	4	45.6764	45.4424	45.4804	45.2528	45.1984	45.4245	45.4762	45.7934	45.8328	45.8082	45.3953	45.0446	44.7253	44.407	44.0731	43.8079	43.6415	43.1687	42.7204	42.0914	41.6282	41.1253	40.7566	40.411	40.0792	39.348	38.6268	37.9294	37.357	36.8966	36.4597	35.9351	35.5462	34.9318	34.8463	34.4687	34.7846	33.397	33.4119	34.135	34.1035	33.0431	32.778	32.0514	31.2837	30.0037	28.2525	26.5414
	5	47.3864	47.692	48.0822	48.5885	48.9735	49.037	48.9166	49.4778	49.5008	49.5309	49.7203	49.2258	49.4946	49.7049	49.8198	49.418	49.2106	49.0822	48.8313	48.4027	47.92	47.3756	46.6429	46.3088	45.7819	45.3314	44.4132	43.2899	42.5425	41.2111	40.62	39.4045	38.2533	37.0112	35.8074	34.9643	33.9565	32.6411	31.772	31.652	31.7356	30.2467	29.1835	28.4834	27.8419	27.4929	27.1885	26.6731
	6	46.5043	46.7107	46.584	46.9561	48.3576	48.8942	48.6454	48.331	48.1083	46.4864	46.0515	45.4138	45.0817	43.9715	42.4778	41.7227	40.5117	39.7892	39.1201	38.2793	37.6051	36.9034	36.2385	35.6115	35.0436	34.4353	33.8102	33.2735	32.6898	31.9999	31.4703	30.8491	30.4683	30.4435	30.223	29.7322	29.2534	29.11	28.6082	28.0731	27.4821	27.1278	26.6838	26.3591	26.122	25.8924	25.2087	24.2472
50%MVIC	1	43.6786	44.2453	44.2037	44.8766	45.4185	45.2967	45.2202	45.2118	45.4743	45.7358	45.7432	46.0015	45.6989	45.0856	44.461	44.4149	43.6993	43.9129	44.2744	44.2735	44.2967	44.7246	44.6213	44.5078	44.0472	43.2897	42.3596	42.0767	40.7733	37.9356	37.0753	36.5364	36.1861	35.5048	34.556	34.2474	33.6852	32.8989	32.7555	32.4973	32.0997	31.9364	31.6095	31.3052	30.634	29.7449	28.7866	28.2624
	2	43.4213	43.9613	44.4368	44.8354	45.3062	45.5378	45.5839	45.5517	45.4333	45.1685	45.2051	45.1813	45.0526	44.546	44.0649	43.8735	43.393	42.9356	42.3428	42.5812	41.9909	41.2003	40.7236	40.4777	39.8603	39.0158	38.4386	37.7649	36.8877	36.0737	35.8366	35.058	34.5627	34.0652	33.759	33.113	32.5276	32.1869	31.3497	30.5922	30.4122	29.7251	28.7388	28.2184	27.6642	27.1518	26.7323	26.3277
	3	47.283	47.5323	48.4315	48.8601	48.9281	48.9798	48.932	48.6138	48.4202	48.4732	48.2529	48.0926	48.0881	47.8462	47.8322	47.4457	47.3075	47.2034	46.8267	46.4486	45.9795	45.8867	45.4742	45.0709	44.3608	44.4196	44.1617	43.6058	43.2676	42.8086	42.9365	42.5812	42.1789	41.6502	41.0599	40.8351	40.5714	40.1507	38.736	38.8415	38.9656	38.405	38.1055	37.2135	36.2232	35.9846	34.5171	33.9133
	4	44.1807	44.1862	44.4938	44.401	44.4254	44.4878	44.2854	44.1078	43.5881	43.4994	43.6534	43.5617	43.4873	43.3692	43.1037	42.7652	42.3347	41.9389	41.4906	41.2166	40.8163	40.5605	40.1569	39.5149	39.302	38.8377	37.9389	37.5661	37.4109	36.7156	36.1689	35.4092	35.5396	35.1295	35.0709	34.7862	34.012	32.2981	31.8732	30.9599	30.4396	30.9547	30.5169	30.3768	29.0178	27.473	24.6473	24.4479
	5	46.6864	47.6911	47.9608	48.6383	48.5909	48.7674	49.019	49.4171	49.4678	49.3994	49.6748	49.7567	49.6608	49.216	49.349	49.8241	50.0119	49.912	49.9145	49.6438	49.1976	48.9134	48.3674	47.9351	47.434	46.8655	46.1239	45.3305	44.7042	43.449	42.4888	41.1818	40.0831	38.9929	38.2177	37.1473	35.8336	34.4783	33.7395	33.2694	33.0056	32.3598	31.7744	31.3818	30.5444	29.7628	28.877	28.2081
	6	46.5986	46.9805	46.8265	46.6925	46.7119	47.2698	47.0271	46.0459	45.7796	45.8351	44.8184	44.283	43.8079	43.0586	42.6906	41.6963	40.7139	40.1536	39.3067	38.4226	37.7785	36.8498	36.2717	35.5302	34.7694	33.9158	33.3106	32.6354	31.8842	31.3963	30.889	30.5358	30.0626	29.5505	29.1117	28.5408	27.9427	27.6004	27.0158	26.3611	25.4816	24.5999	24.3223	23.5771	22.9224	22.5655	22.1511	21.7892
[truncated: 2 more columns]

## Sheet: D)AponeurosisWidth
Aponeurosis width (mm)		% Central aponeurosis length
	Participant	10	11	12	13	14	15	16	17	18	19	20	21	22	23	24	25	26	27	28	29	30	31	32	33	34	35	36	37	38	39	40	41	42	43	44	45	46	47	48	49	50	51	52	53	54	55	56	57
0%MVIC	1	2.61182	2.81251	2.9873	3.14807	3.27256	3.40597	3.53125	3.65364	3.72868	3.80682	3.88529	3.94347	4.00424	4.06377	4.14599	4.21546	4.28042	4.3259	4.35757	4.39713	4.44015	4.47977	4.51712	4.54839	4.58227	4.62376	4.66542	4.69964	4.73348	4.76845	4.77362	4.78094	4.77528	4.77473	4.77239	4.77249	4.75767	4.74507	4.73025	4.71645	4.70494	4.6992	4.68946	4.68206	4.67023	4.65858	4.64159	4.61971
	2	3.25418	3.37113	3.49582	3.74248	3.83336	3.92054	4.01094	4.08307	4.13142	4.20576	4.27462	4.3245	4.37962	4.44362	4.4866	4.54735	4.59894	4.6312	4.6791	4.72949	4.76864	4.80002	4.84311	4.86995	4.9133	4.93785	4.96572	5.02082	5.06022	5.09822	5.14791	5.18804	5.2149	5.26359	5.30422	5.34309	5.36451	5.37516	5.39553	5.41469	5.41532	5.42701	5.446	5.44447	5.45409	5.47134	5.47665	5.46659
	3	2.83736	2.97784	3.11982	3.25785	3.40181	3.54094	3.62239	3.69824	3.77088	3.8141	3.85124	3.89671	3.94513	3.98929	4.03694	4.07719	4.12302	4.16112	4.20543	4.25065	4.29475	4.32854	4.34347	4.36778	4.39602	4.41552	4.434	4.45196	4.44985	4.43982	4.42079	4.39881	4.40272	4.39858	4.38679	4.37091	4.35135	4.32847	4.29424	4.27021	4.25184	4.23061	4.19995	4.17122	4.13629	4.1036	4.06591	4.0258
	4	2.08026	2.23542	2.39359	2.76071	2.85114	2.94116	3.03123	3.12552	3.21325	3.30622	3.3929	3.48606	3.557	3.59607	3.61042	3.62965	3.65252	3.67935	3.70167	3.72151	3.75264	3.76683	3.77228	3.77789	3.781	3.7857	3.78007	3.77742	3.78297	3.77915	3.7812	3.77979	3.77536	3.78357	3.77734	3.77349	3.77982	3.77864	3.75263	3.73154	3.71176	3.68575	3.65394	3.61702	3.57691	3.54095	3.51102	3.47007
	5	1.80569	1.90144	1.99623	2.08568	2.18975	2.29107	2.3859	2.52874	2.62361	2.71364	2.80617	2.89163	2.97673	3.05411	3.13802	3.18559	3.22602	3.25768	3.28736	3.29893	3.30704	3.31081	3.32279	3.33042	3.33776	3.34435	3.35238	3.35916	3.36277	3.37291	3.38289	3.3941	3.40549	3.40599	3.39916	3.39953	3.39719	3.39195	3.38732	3.38273	3.36934	3.36036	3.35653	3.35049	3.33981	3.3319	3.31913	3.30447
	6	2.72076	2.89649	3.03432	3.15582	3.22106	3.27688	3.33119	3.39022	3.44312	3.49973	3.55485	3.60525	3.66046	3.71396	3.77284	3.82626	3.87072	3.90037	3.93403	3.95956	3.99095	4.02306	4.0541	4.07815	4.10752	4.13774	4.16666	4.19452	4.21725	4.22805	4.23806	4.24217	4.24648	4.25224	4.25282	4.25506	4.25726	4.2573	4.2599	4.25899	4.2646	4.26583	4.26355	4.26468	4.24588	4.21982	4.19788	4.1747
	7	2.41131	2.51793	2.63277	2.74821	2.8411	2.91667	2.99245	3.06651	3.14201	3.20077	3.26184	3.32522	3.3901	3.45618	3.52111	3.57513	3.6407	3.70467	3.76587	3.82248	3.89552	3.95908	4.01148	4.06722	4.13889	4.19413	4.2201	4.24651	4.26078	4.27667	4.29283	4.31289	4.3301	4.3353	4.33666	4.32619	4.29824	4.269	4.22415	4.1933	4.1521	4.11085	4.07525	4.04115	4.00029	3.95941	3.92063	3.88279
5%MVIC	1	2.3132	2.40926	2.51101	2.6129	2.71968	2.82338	2.92083	3.00953	3.09412	3.17163	3.257	3.34033	3.41183	3.47777	3.54824	3.63013	3.70683	3.76086	3.80112	3.83728	3.87464	3.91062	3.94549	3.96814	3.98131	3.9978	4.01721	4.03696	4.04294	4.05228	4.06763	4.07242	4.07648	4.08482	4.0867	4.09176	4.0998	4.10127	4.093	4.07823	4.05883	4.0394	4.02317	4.00297	3.98521	3.96871	3.9465	3.93193
	2	3.46981	3.65634	3.78159	3.94151	4.0912	4.26091	4.33653	4.42293	4.50964	4.59537	4.67425	4.73939	4.78857	4.83756	4.88793	4.92808	5.00941	5.07965	5.1495	5.2159	5.26123	5.28701	5.33065	5.37994	5.4142	5.46262	5.49646	5.53168	5.56999	5.60399	5.64247	5.68298	5.72186	5.76903	5.80653	5.85171	5.89118	5.93309	5.97846	6.0188	6.05723	6.08749	6.10389	6.12046	6.11989	6.10677	6.09908	6.10394
	3	2.80576	2.95189	3.07952	3.19818	3.28522	3.35098	3.42254	3.48994	3.56416	3.62398	3.69396	3.75565	3.81839	3.87538	3.92701	3.97428	4.03118	4.08961	4.14738	4.19527	4.23129	4.2477	4.24652	4.24734	4.24123	4.24238	4.23787	4.23814	4.23983	4.23337	4.23078	4.23254	4.23655	4.23714	4.23115	4.23769	4.23738	4.23236	4.20847	4.19639	4.18345	4.17416	4.15135	4.13796	4.13028	4.11053	4.08472	4.05564
	4	2.64218	2.76302	2.84575	2.9224	3.00075	3.06947	3.14777	3.21982	3.30999	3.36838	3.41563	3.46816	3.52125	3.57512	3.60426	3.61723	3.6304	3.64302	3.65733	3.67021	3.68452	3.6915	3.68977	3.68879	3.68655	3.68545	3.68141	3.67329	3.67095	3.67208	3.67252	3.67226	3.6742	3.67125	3.66585	3.65127	3.63554	3.62282	3.61336	3.59898	3.58312	3.56731	3.55798	3.54278	3.52787	3.50845	3.47373	3.44286
	5	2.22156	2.36092	2.39729	2.54833	2.62275	2.68766	2.73953	2.79978	2.85928	2.92623	2.97713	3.04433	3.10237	3.15036	3.17767	3.19912	3.21806	3.23256	3.25968	3.28573	3.28973	3.29723	3.29795	3.30391	3.3078	3.30696	3.30586	3.30226	3.30377	3.30139	3.30474	3.30168	3.30889	3.30327	3.30203	3.29469	3.2865	3.28272	3.28248	3.28272	3.27484	3.26447	3.2638	3.25376	3.24027	3.2247	3.21524	3.20605
	6	2.49977	2.69773	2.88049	3.01345	3.11623	3.24238	3.31765	3.35451	3.38048	3.42732	3.46618	3.49697	3.5453	3.58412	3.61763	3.64695	3.66486	3.69635	3.71519	3.72598	3.7385	3.757	3.77512	3.79418	3.80474	3.82054	3.83337	3.85566	3.86537	3.88889	3.90603	3.91825	3.92997	3.9418	3.94974	3.96723	3.97629	3.98787	4.00114	4.01192	4.02046	4.03441	4.03359	4.0309	4.02383	4.00121	3.97134	3.95541
	7	2.59231	2.71196	2.7992	2.86336	2.92736	2.98901	3.0495	3.11412	3.1815	3.24214	3.29947	3.36235	3.41655	3.47322	3.52041	3.57915	3.62809	3.68645	3.73974	3.79951	3.86261	3.90272	3.96326	3.99453	4.03201	4.05182	4.08905	4.12496	4.14582	4.18168	4.19824	4.20335	4.18692	4.18294	4.17767	4.16706	4.17541	4.16513	4.15077	4.13134	4.10891	4.08809	4.06697	4.04343	4.01288	3.99241	3.97457	3.95552
10%MVIC	1	2.21475	2.30453	2.38554	2.46653	2.56031	2.65142	2.73273	2.81577	2.90378	2.98729	3.07915	3.16419	3.26576	3.34674	3.4381	3.52328	3.60762	3.68068	3.75296	3.80579	3.86307	3.91088	3.96089	4.01589	4.06843	4.11847	4.16366	4.20439	4.24251	4.27662	4.30393	4.34334	4.37752	4.40267	4.4326	4.42668	4.39937	4.37539	4.33996	4.31794	4.29017	4.25404	4.22627	4.1903	4.16144	4.13247	4.09233	4.04507
	2	3.06423	3.62283	3.81197	4.0047	4.15445	4.37839	4.57529	4.66087	4.71648	4.7808	4.82254	4.90717	4.97116	5.04188	5.12102	5.18704	5.27001	5.32923	5.36885	5.41215	5.61515	5.64717	5.67355	5.71193	5.72832	5.77199	5.78367	5.80934	5.83334	5.8493	5.87854	5.91069	5.94661	5.98481	6.00643	6.04272	6.08043	6.10391	6.13523	6.14746	6.13685	6.13623	6.12922	6.12115	6.11735	6.11304	6.09184	6.08201
	3	2.42515	2.59245	2.74374	2.91422	3.07274	3.23103	3.37119	3.47356	3.56812	3.67242	3.75687	3.85669	4.08655	4.10535	4.13092	4.14658	4.16031	4.16904	4.18238	4.17443	4.20032	4.21269	4.228	4.23614	4.23352	4.24184	4.24608	4.24503	4.2322	4.22662	4.22646	4.22581	4.21692	4.19127	4.18001	4.17055	4.15824	4.13983	4.12818	4.11727	4.10712	4.09524	4.08297	4.07336	4.06215	4.05342	4.03576	4.01781
	4	2.99876	3.16093	3.34679	3.45619	3.52339	3.59397	3.66736	3.75222	3.81934	3.87203	3.90049	3.92542	3.93696	3.95531	3.97648	3.98864	4.00185	4.01485	4.03097	4.04839	4.0597	4.07364	4.08715	4.09498	4.10383	4.10774	4.11278	4.11713	4.11648	4.11369	4.1076	4.10221	4.09147	4.0818	4.07532	4.06216	4.05684	4.04833	4.03665	4.01245	3.97377	3.93287	3.89377	3.85696	3.8214	3.77843	3.7369	3.70272
	5	2.53501	2.57928	2.62972	2.68943	2.72896	2.77965	2.84081	2.90217	2.95792	3.00729	3.05884	3.10732	3.15351	3.19835	3.2483	3.29724	3.34361	3.3964	3.4404	3.4746	3.50655	3.5142	3.51046	3.51222	3.50863	3.5079	3.50687	3.50603	3.50926	3.51116	3.50932	3.50551	3.50421	3.51732	3.5163	3.51492	3.51127	3.51067	3.51459	3.5129	3.50854	3.50716	3.50284	3.49829	3.49951	3.50005	3.49904	3.50494
	6	2.51721	2.7249	2.83457	2.93751	3.046	3.11901	3.19083	3.26347	3.32931	3.39591	3.44082	3.48454	3.5238	3.56504	3.60654	3.64553	3.68118	3.72648	3.75968	3.79872	3.83711	3.87643	3.91795	3.95163	3.99171	4.03163	4.06121	4.08312	4.10033	4.12091	4.14238	4.15634	4.1764	4.20011	4.21944	4.22494	4.23937	4.25133	4.26418	4.27868	4.28653	4.30306	4.30452	4.31012	4.31041	4.30287	4.28915	4.26867
	7	2.41301	2.55156	2.70888	2.85083	2.94584	3.04996	3.14822	3.24095	3.34162	3.43985	3.53084	3.63364	3.73115	3.81538	3.89247	3.96097	4.02044	4.09587	4.15804	4.23272	4.29938	4.365	4.39491	4.38873	4.39702	4.40867	4.39997	4.42493	4.42554	4.4144	4.42572	4.39594	4.36523	4.35989	4.33703	4.32375	4.31241	4.29446	4.27964	4.26664	4.24527	4.21374	4.18922	4.15228	4.12378	4.09365	4.05522	4.03137
25%MVIC	1	3.04798	3.18653	3.31089	3.43514	3.56132	3.68186	3.79808	3.89592	4.0005	4.10463	4.20673	4.30996	4.3892	4.43639	4.48638	4.53922	4.58899	4.63495	4.69202	4.74222	4.79902	4.84858	4.90971	4.96182	5.01985	5.06294	5.09937	5.12886	5.14635	5.16393	5.15612	5.15244	5.14896	5.14041	5.13438	5.13928	5.14432	5.14488	5.14137	5.13058	5.13332	5.1227	5.10994	5.08119	5.05786	5.03745	5.01671	4.99311
	2	3.19793	3.34925	3.50134	3.65589	3.80614	3.98963	4.11254	4.45271	4.54757	4.64473	4.74268	4.83549	4.92668	5.02487	5.11778	5.19709	5.27069	5.3422	5.40643	5.76214	5.81588	5.9005	5.93812	5.99642	6.05666	6.10451	6.1713	6.21116	6.25487	6.30933	6.34854	6.38589	6.42239	6.46815	6.53604	6.54631	6.58332	6.60229	6.61893	6.60282	6.60393	6.59251	6.57596	6.56594	6.5456	6.52571	6.49063	6.45246
	3	2.85881	3.08835	3.34687	3.56898	3.75101	3.85067	3.90151	3.94017	3.98011	4.02868	4.07222	4.10079	4.14069	4.17989	4.20833	4.2506	4.29178	4.32231	4.34505	4.3637	4.38649	4.40312	4.42257	4.43968	4.46617	4.4808	4.49581	4.50452	4.51343	4.53216	4.55214	4.55877	4.56793	4.56889	4.56786	4.54292	4.52109	4.49508	4.47207	4.43909	4.41217	4.38762	4.36024	4.33909	4.31234	4.28419	4.25792	4.2336
	4	2.31879	2.51319	2.69793	2.90238	3.08893	3.2834	3.71273	4.04337	4.08964	4.12637	4.15426	4.18784	4.2185	4.25435	4.28247	4.3099	4.33095	4.35039	4.35617	4.36361	4.37703	4.38149	4.39633	4.39751	4.41216	4.4197	4.4245	4.42783	4.42392	4.41647	4.40877	4.3898	4.37994	4.36771	4.35741	4.33943	4.32978	4.31795	4.30425	4.28316	4.27024	4.25093	4.23214	4.218	4.19956	4.16762	4.12399	4.07604
	5	2.07751	2.40962	2.5245	2.64064	2.76592	2.86225	2.94417	3.02048	3.10435	3.18411	3.26569	3.35278	3.41606	3.46802	3.53121	3.59521	3.64159	3.68921	3.72321	3.74618	3.76469	3.78524	3.79876	3.82498	3.8367	3.83554	3.8239	3.81786	3.80896	3.79561	3.78493	3.77634	3.76938	3.75496	3.7354	3.727	3.71495	3.70517	3.69243	3.68611	3.67336	3.65607	3.6458	3.63971	3.62989	3.62211	3.6078	3.59935
	6	2.6688	2.86072	2.97996	3.08811	3.20646	3.3119	3.58201	3.60739	3.67422	3.7497	3.83099	3.89783	3.98408	4.0484	4.08144	4.12263	4.17239	4.20246	4.23932	4.30159	4.32184	4.35799	4.42303	4.42837	4.46413	4.50186	4.53055	4.56073	4.60072	4.63216	4.64961	4.67446	4.69839	4.72028	4.73482	4.74291	4.72798	4.71488	4.69417	4.67559	4.64796	4.6243	4.59946	4.57719	4.55315	4.5279	4.501	4.46719
	7	2.71003	2.88109	3.02548	3.11224	3.20171	3.29799	3.39245	3.47954	3.5714	3.66164	3.75373	3.84253	3.91764	3.99726	4.06952	4.14003	4.23078	4.30924	4.38072	4.45226	4.50772	4.53513	4.53355	4.51775	4.49853	4.49744	4.48691	4.47043	4.44887	4.44353	4.43464	4.41412	4.39527	4.37737	4.36127	4.33885	4.31407	4.29459	4.27914	4.26346	4.23951	4.21449	4.20093	4.18503	4.16478	4.13976	4.10994	4.09584
50%MVIC	1	2.83617	2.96803	3.11796	3.2452	3.37825	3.52285	3.64193	3.75227	3.83797	3.92859	4.00192	4.09429	4.18274	4.26846	4.36168	4.43513	4.52283	4.59946	4.68891	4.77693	4.85824	4.91919	4.986	5.05017	5.12236	5.18252	5.24039	5.28045	5.32408	5.36434	5.40893	5.45042	5.49996	5.52938	5.55816	5.55712	5.54234	5.54447	5.54824	5.54107	5.5293	5.5354	5.5363	5.52301	5.51057	5.4725	5.43139	5.39171
	2	3.02867	3.23454	3.43935	3.65402	3.81346	3.92772	4.06433	4.43509	4.51007	4.58488	4.67536	4.74783	4.82229	4.90868	4.99249	5.08003	5.15979	5.23226	5.32449	5.41394	5.50157	5.58326	5.66825	5.74853	5.83382	5.92948	6.00254	6.08924	6.1724	6.24864	6.34515	6.43037	6.50993	6.58262	6.77035	6.78243	6.75193	6.71676	6.69709	6.65667	6.60598	6.58193	6.556	6.52957	6.50888	6.45472	6.38909	6.31848
	3	2.44348	2.62002	2.83718	3.04478	3.23834	3.4558	3.87921	3.97279	4.04866	4.12341	4.18764	4.24402	4.30609	4.38723	4.45468	4.51498	4.58292	4.65044	4.70812	4.75954	4.8023	4.84144	4.87426	4.90424	4.91318	4.90579	4.91133	4.91446	4.9049	4.90636	4.90795	4.90642	4.89215	4.88688	4.85233	4.8263	4.79075	4.76824	4.72719	4.68652	4.64214	4.60622	4.56891	4.51835	4.47303	4.43684	4.39732	4.34925
	4	2.78911	3.31165	3.47166	3.71297	3.86466	3.97611	4.09646	4.214	4.33978	4.44944	4.53137	4.56876	4.58958	4.60216	4.60283	4.61138	4.62363	4.63949	4.65042	4.65973	4.66732	4.67687	4.67785	4.6808	4.6764	4.67097	4.66699	4.66124	4.66098	4.65527	4.64482	4.64506	4.64391	4.63542	4.61662	4.59107	4.56836	4.53318	4.50809	4.48206	4.45357	4.42061	4.38732	4.33942	4.29646	4.25525	4.20923	4.16036
	5	2.67224	2.75583	2.83929	2.934	3.01973	3.11425	3.19964	3.29529	3.38094	3.47731	3.56216	3.65298	3.71786	3.78227	3.83194	3.85102	3.85438	3.85086	3.855	3.85118	3.862	3.87095	3.86526	3.86457	3.87064	3.87942	3.8713	3.87188	3.86605	3.86962	3.88347	3.87983	3.88757	3.89657	3.90095	3.91059	3.90188	3.90024	3.90138	3.90355	3.89887	3.89172	3.87254	3.86924	3.85654	3.85079	3.84003	3.82795
	6	2.6549	2.89156	3.1256	3.39164	3.58292	3.67384	3.72136	3.77127	3.80949	3.85806	3.9048	3.9467	3.99019	4.03623	4.08676	4.13087	4.17641	4.2295	4.29488	4.33767	4.36208	4.4022	4.44135	4.48207	4.51745	4.55806	4.61014	4.65218	4.69304	4.73755	4.7793	4.81107	4.84546	4.87541	4.89127	4.88557	4.87136	4.85617	4.83885	4.82555	4.79734	4.76429	4.71767	4.67583	4.63766	4.6026	4.55781	4.5185
	7	2.44785	2.60091	2.74104	2.89584	3.03124	3.15761	3.29462	3.41967	3.53501	3.64161	3.72796	3.83717	3.92422	4.02727	4.11793	4.21969	4.31087	4.38505	4.42673	4.46813	4.50973	4.5528	4.58853	4.59437	4.59718	4.60011	4.60464	4.606	4.61133	4.59929	4.58359	4.54763	4.51209	4.48282	4.45566	4.42221	4.39608	4.38111	4.3545	4.32831	4.30557	4.28182	4.24911	4.22257	4.19857	4.17344	4.14028	4.11592
[truncated: 32 more columns]
